# Supplementary material for: Clinical Characteristics of Human Mpox (Monkeypox) in 2022: A Systematic Review and Meta-Analysis
Source: MDPI journal article supplement (doi:10.3390/pathogens12010146), 2023-01-15
Supplement: s1 [file s1]

| Supplementary Table S1 Characteristics of studies reporting clinical characteristics of mpox |                   |                   |              |                                                 |       |      |                   |                  |        |                             |                                   |                  |                            |                           |                                  |                               |                  |
|----------------------------------------------------------------------------------------------|-------------------|-------------------|--------------|-------------------------------------------------|-------|------|-------------------|------------------|--------|-----------------------------|-----------------------------------|------------------|----------------------------|---------------------------|----------------------------------|-------------------------------|------------------|
| Country*                                                                                     | First author      | Publication date¶ | Study design | Age                                             | Males | MSM  | Hospi-<br>talized | HIV-<br>Positive | On ART | CD4<br>(cell/<br>µL)        | Viral<br>load<br>(copies/<br>ml ) | Exposure         |                            |                           |                                  |                               | Vacci-<br>nation |
|                                                                                              |                   |                   |              | (median/<br>mean<br>[range/<br>IQR],<br>years)* |       |      |                   |                  |        |                             |                                   | Travel<br>abroad | Contact<br>with<br>animals | Contact<br>with<br>people | Recent<br>sexual<br>exposur<br>e | Mass<br>event/party<br>/sauna |                  |
| 15<br>countries*                                                                             | Angelo            | 7-Oct             | CS*          | 37                                              | 100%  | 99%  | NA                | 44%              | NA     | 713(I<br>QR50<br>0–<br>885) | 92%<br>undetec<br>table           | 18%              | 2%                         | 10%                       | 99%                              | 23%                           | 9%               |
| 16<br>countries*                                                                             | Thornhill         | 21-Jul            | CS*          | 38(18-68)*                                      | 100%  | 98%  | 13%               | 41%              | 96%    | 680(I<br>QR51<br>3–<br>861) | 95%<50<br>97%<20<br>0             | 28%              | NA                         | 26%                       | 95%                              | NA                            | 9%               |
| Argentina*                                                                                   | Pastor            | 24-Aug            | CS           | 27.5                                            | 100%  | 100% | 0%                | 0%               | 0%     | NA                          | NA                                | 100%             | 0%                         | 0%                        | NA                               | NA                            | NA               |
| Brazil                                                                                       | Martins-<br>Filho | 27-Sep            | CS           | 24                                              | 33%   | NA   | 0%                | NA               | NA     | NA                          | NA                                | 0%               | NA                         | 0%                        | 33%                              | NA                            | NA               |

| Country | Author  | Date   | Study Design | N         | Sensitivity | Specificity | PPV | NPV | LR+ | LR- | DOR | QI  | Heterogeneity | I <sup>2</sup> | P-value | OR  | 95% CI |
|---------|---------|--------|--------------|-----------|-------------|-------------|-----|-----|-----|-----|-----|-----|---------------|----------------|---------|-----|--------|
|         |         |        |              |           |             |             |     |     |     |     |     |     |               |                |         |     |        |
| Brazil  | Lopes   | 23-Nov | CS           | 28        | 100%        | NA          | NA  | NA  | NA  | NA  | NA  | NA  | NA            | NA             | 100%    | NA  | NA     |
| Brazil  | Salvato | 30-Sep | CS           | NA        | NA          | NA          | NA  | NA  | NA  | NA  | NA  | NA  | NA            | 67%            | NA      | NA  | NA     |
| Canada  | Sukhdeo | 3-Oct  | CS           | 41        | 100%        | NA          | NA  | NA  | NA  | NA  | NA  | NA  | NA            | NA             | NA      | NA  | NA     |
| Europe  | Vaughan | Sep    | SD           | 37(31-44) | 86%         | 97%         | 10% | 15% | NA  | NA  | NA  | NA  | NA            | NA             | NA      | 17% | 17%    |
| France  | Palich  | 29-Sep | CS*          | 34(29-40) | 100%        | 98%         | NA  | 44% | NA  | NA  | NA  | NA  | NA            | NA             | NA      | NA  | NA     |
| France  | Mailhe  | 14-Aug | PS           | 35(30-41) | 100%        | 93%         | 6%  | 28% | NA  | NA  | NA  | 29% | 14%           | 42%            | 40%     | NA  | 11%    |

|         |          |        |     |                  |      |      |     |     |      |                    |            |     |     |     |      |    |      |
|---------|----------|--------|-----|------------------|------|------|-----|-----|------|--------------------|------------|-----|-----|-----|------|----|------|
| France* | Thy      | 4-Aug  | CS* | 24(15.8-26.8)    | 92%  | 92%  | 0%  | 33% | 0%   | NA                 | NA         | 25% | 17% | 58% | 42%  | NA | 100% |
| Germany | Nörz     | Oct    | CS* | NA               | 100% | 100% | 31% | 20% | 100% | NA                 | NA         | NA  | NA  | NA  | NA   | NA | 0%   |
| Germany | Hornuss  | 23-Sep | CS  | 33.5             | 100% | 100% | 25% | 0%  | NA   | NA                 | NA         | 50% | NA  | 0%  | 100% | NA | 25%  |
| Germany | Kreuter  | 16-Aug | CS  | 38               | 100% | 100% | NA  | 0%  | NA   | NA                 | NA         | 0%  | NA  | NA  | 100% | NA | NA   |
| Germany | Hoffmann | 4-Sep  | CS* | 39 (20–69)‡      | 100% | 100% | 4%  | 47% | NA   | 691(Range185–1603) | 4.2% >50   | NA  | NA  | NA  | NA   | NA | 13%  |
| Germany | Hoffmann | 19-Jul | CS* | 38.7(30.5-46.9)+ | 100% | 100% | 6%  | 47% | 100% | QR275-1603)        | 97.7% <200 | NA  | NA  | NA  | NA   | NA | 13%  |

| Country  | Author      | Date   | Study Type | n         | CS   | CS   | CS   | CS  | CS  | CS                | CS                    | CS   | CS | CS  | CS   | CS | CS   |
|----------|-------------|--------|------------|-----------|------|------|------|-----|-----|-------------------|-----------------------|------|----|-----|------|----|------|
| Germany  | Noe         | 11-Jul | CS         | 29        | 100% | 100% | 100% | 50% | NA  | NA                | NA                    | NA   | NA | 50% | 100% | NA | NA   |
| Germany  | Hermanussen | 30-Sep | CS         | 44        | 100% | 67%  | 100% | 33% | 33% | 50                | 1 with<br>1.29 × 10^6 | NA   | NA | NA  | 67%  | NA | 33%  |
| Germany  | Wang        | 29-Jul | CS         | 31(27–41) | 100% | NA   | 100% | 33% | NA  | NA                | NA                    | NA   | NA | NA  | NA   | NA | NA   |
| Germany* | Pfäfflin    | 12-Aug | CS         | NA        | 100% | 100% | 100% | 33% | NA  | 100%<br>> 500 /μl | NA                    | 0%   | NA | NA  | NA   | NA | NA   |
| India*   | Relhan      | 21-Oct | CS         | 34        | 60%  | NA   | NA   | NA  | NA  | NA                | NA                    | NA   | NA | NA  | 60%  | NA | 100% |
| India    | Yadav       | Nov    | CS         | 33        | 100% | NA   | NA   | NA  | NA  | NA                | NA                    | 100% | NA | 50% | 50%  | NA | NA   |

[illegible]

[illegible]

|           |                |        |     |        |      |      |    |      |      |     |            |    |    |     |      |     |      |
|-----------|----------------|--------|-----|--------|------|------|----|------|------|-----|------------|----|----|-----|------|-----|------|
| Peru      | Pampa-Espinoza | 12-Aug | CS  | 39     | 78%  | NA   | NA | NA   | NA   | NA  | NA         | NA | NA | 22% | NA   | NA  | NA   |
| Portugal* | de Sousa       | Oct    | CS  | 34.5   | 100% | 100% | NA | 100% | 100% | NA  | NA         | 0% | NA | 0%  | 100% | NA  | 0%   |
| Portugal  | Alpalhão       | 21-Oct | CS  | 35     | 100% | 88%  | NA | 52%  | NA   | NA  | NA         | NA | NA | NA  | NA   | NA  | 12%  |
| Portugal  | Brazão         | 12-Oct | CS  | 49.5   | 100% | 100% | NA | NA   | NA   | 794 | Undetected | NA | NA | NA  | NA   | NA  | 100% |
| Portugal  | de Sousa       | 27-Sep | CS* | 35.1 * | 100% | 83%  | NA | 45%  | NA   | NA  | NA         | NA | NA | NA  | 94%  | NA  | NA   |
| Portugal* | Caldeira       | 21-Oct | CS* | 31.5*  | 100% | 100% | NA | NA   | NA   | NA  | NA         | NA | NA | NA  | 16%  | 16% | NA   |

| Country   | Leader           | Date   | System | Cases      | Deaths | Recovery | Testing | Hospitals | ICU | Ventilators | Healthcare | Economic | Social | Education | Environment | Culture | Other |
|-----------|------------------|--------|--------|------------|--------|----------|---------|-----------|-----|-------------|------------|----------|--------|-----------|-------------|---------|-------|
|           |                  |        |        |            |        |          |         |           |     |             |            |          |        |           |             |         |       |
| Portugal* | Perez Duque      | 2-Jun  | CS     | 33(22-51)* | 100%   | 95%      | 11%     | 54%       | NA  | NA          | NA         | 8%       | 13%    | 10%       | NA          | NA      | NA    |
| Singapore | Koh              | Aug    | CS*    | 36         | 100%   | NA       | NA      | NA        | NA  | NA          | NA         | 33%      | NA     | 33%       | 33%         | NA      | NA    |
| Spain     | Tarín-Vicente    | 8-Aug  | PS     | 37(31-42)  | 97%    | 92%      | 2%      | 40%       | 99% | < 500       | NA         | 14%      | NA     | 29%       | NA          | 36%     | 18%   |
| Spain*    | Gomez-Garberi    | 9-Sep  | CS*    | 42(20-56)  | 100%   | 71%      | NA      | 57%       | 93% | 663.00      | NA         | 0%       | NA     | NA        | 14%         | NA      | NA    |
| Spain*    | Betancourt-Plata | 19-Oct | CS*    | 40(35-51)  | 100%   | 88%      | NA      | 64%       | NA  | 759         | 100%<50    | NA       | NA     | NA        | 100%        | NA      | NA    |
| Spain     | Rodríguez        | 14-Jul | CS     | 37         | 99%    | 87%      | 6%      | NA        | NA  | NA          | NA         | 14%      | NA     | NA        | 86%         | 64%     | NA    |



|       |                    |        |     |                  |      |     |    |     |     |                    |        |    |     |     |      |    |     |
|-------|--------------------|--------|-----|------------------|------|-----|----|-----|-----|--------------------|--------|----|-----|-----|------|----|-----|
| Spain | Alba Català        | 2-Aug  | PS  | 38.7(30.5-46.9)+ | 100% | 99% | 2% | 42% | NA  | 698 (IQ R549 -930) | 6 (8%) | NA | 15% | NA  | 99%  | NA | 12% |
| Spain | Rodríguez          | 1-Sep  | CS* | 37               | 99%  | 21% | 6% | NA  | NA  | NA                 | NA     | 5% | NA  | 8%  | 26%  | NA | NA  |
| Spain | Rodríguez-Cuadrado | 3-Oct  | CS  | 28.5             | 100% | NA  | NA | NA  | NA  | NA                 | NA     | NA | NA  | NA  | 100% | NA | NA  |
| Spain | Del Río García     | 29-Sep | CS* | 26(16–40)        | 65%  | NA  | NA | NA  | NA  | NA                 | NA     | NA | NA  | 0%  | NA   | NA | 0%  |
| Spain | García-Piqueras    | 12-Oct | CS* | 36(22-54)        | 98%  | 92% | 2% | 47% | 47% | NA                 | NA     | 4% | 0%  | 15% | NA   | NA | 17% |
| Spain | Aguilera-Alonso    | 2-Sep  | CS* | 15 (8–16)        | 63%  | NA  | 0% | NA  | NA  | NA                 | NA     | NA | 0%  | 19% | 19%  | 0% | NA  |

| Country | Author         | Date   | Category | Count     | Confidence | Accuracy | Recall | Precision | F1   | AUC                  | Log Loss      | Calibration | Interpretability | Robustness | Adaptability | Scalability | Overall Score |
|---------|----------------|--------|----------|-----------|------------|----------|--------|-----------|------|----------------------|---------------|-------------|------------------|------------|--------------|-------------|---------------|
| Spain   | Leal           | 12-Sep | CS       | 39        | 100%       | 100%     | NA     | NA        | NA   | NA                   | NA            | NA          | NA               | NA         | NA           | NA          | NA            |
| Spain*  | Inigo Martinez | 7-Jul  | CS       | 35        | 99%        | NA       | 4%     | 44%       | NA   | NA                   | NA            | NA          | 77%              | 20%        | NA           | NA          | NA            |
| Spain*  | Orviz          | NA     | CS       | 35        | 100%       | 88%      | 2%     | 40%       | NA   | NA                   | NA            | 2%          | NA               | 15%        | NA           | NA          | 25%           |
| UK      | Nicolò         | 1-Jul  | CS       | 41        | 100%       | 100%     | 9%     | 24%       | 100% | NA                   | NA            | 46%         | NA               | 4%         | 96%          | NA          | NA            |
| UK      | Gedela         | 29-Sep | CS       | NA        | 100%       | 100%     | NA     | 50%       | NA   | NA                   | NA            | NA          | NA               | NA         | 100%         | NA          | NA            |
| UK*     | Patel          | 28-Jul | CS       | 38(32-42) | 100%       | 99%      | 13%    | 36%       | 91%  | 664<br>(IQR 522-894) | 78.6%<br><200 | 27%         | NA               | 26%        | 96%          | NA          | NA            |

|     |                 |        |     |            |      |      |      |     |    |                     |    |     |    |    |      |     |     |
|-----|-----------------|--------|-----|------------|------|------|------|-----|----|---------------------|----|-----|----|----|------|-----|-----|
| USA | Curran          | 1-Sep  | CS* | 35         | 74%  | NA   | 2%   | 38% | NA | 639<br>(IQR452–831) | NA | NA  | NA | NA | NA   | NA  | NA  |
| USA | Pastula         | 23-Sep | CS  | 30§        | 100% | 100% | 100% | 0%  | 0% | NA                  | NA | 0%  | 0% | 0% | NA   | NA  | 0%  |
| USA | Minhaj          | 10-Jun | SD  | 40(28-61)* | NA   | NA   | NA   | NA  | NA | NA                  | NA | 82% | NA | NA | NA   | NA  | NA  |
| USA | Philpott        | 12-Aug | SD  | 35(30–41)  | 91%  | 94%  | 8%   | 41% | NA | NA                  | NA | NA  | NA | NA | 94%  | 38% | 14% |
| USA | Cash-Goldwasser | 21-Oct | CS  | (20-39)‡   | 80%  | NA   | 80%  | 40% | NA | NA                  | NA | NA  | NA | NA | NA   | NA  | NA  |
| USA | Peters          | 27-Jul | CS  | 34         | 100% | NA   | NA   | 50% | NA | NA                  | NA | NA  | NA | NA | 100% | NA  | NA  |

| Country | Author      | Date   | Category | Age          | Gender | Ethnicity | Religion | Sexual Orientation | Disability | Marital Status | Parental Status       | Health Status | Financial Status | Education Status | Employment Status | Other | Notes |
|---------|-------------|--------|----------|--------------|--------|-----------|----------|--------------------|------------|----------------|-----------------------|---------------|------------------|------------------|-------------------|-------|-------|
| USA     | Minhaj      | 9-Sep  | CS       | NA           | NA     | NA        | NA       | NA                 | NA         | NA             | NA                    | 67%           | 0%               | 0%               | NA                | NA    | 33%   |
| USA     | Tanch       | 3-Oct  | CS       | 35           | 100%   | 100%      | 100%     | 50%                | 0%         | NA             | NA                    | NA            | NA               | NA               | 100%              | NA    | NA    |
| USA     | O'Laughlin  | 16-Sep | CS*      | 36.5         | 98%    | NA        | NA       | 46%                | NA         | NA             | NA                    | NA            | NA               | NA               | NA                | NA    | 12%   |
| USA     | Meyero-witz | 13-Oct | CS*      | 34.6 (22–55) | 100%   | 100%      | NA       | 56%                | 75%        | 60%>200        | 1 with 351 190 60%<84 | NA            | NA               | NA               | NA                | NA    | 11%   |
| USA     | Kava        | 11-Nov | CS*      | NA           | 95%    | NA        | NA       | 57%                | NA         | NA             | NA                    | NA            | NA               | NA               | 83%               | NA    | NA    |
| USA     | Hennessee   | 4-Nov  | CS*      | <18          | 80%    | NA        | 11%      | NA                 | NA         | NA             | NA                    | NA            | NA               | NA               | 62%               | NA    | NA    |

|      |                |        |    |                  |      |      |      |      |      |              |    |      |    |     |      |    |     |
|------|----------------|--------|----|------------------|------|------|------|------|------|--------------|----|------|----|-----|------|----|-----|
| USA  | Miller         | 4-Nov  | CS | 34 (20–61)       | 95%  | NA   | 100% | 82%  | 9%   | 7.0%<br>>200 | NA | NA   | NA | NA  | NA   | NA | NA  |
| USA  | Rodriguez-Nava | 30-Sep | CS | 34.5             | 100% | NA   | 100% | NA   | NA   | NA           | NA | NA   | NA | NA  | 100% | NA | 0%  |
| USA  | Desai          | 22-Aug | PS | 40.7(26-76)<br>* | 100% | NA   | NA   | 36%  | NA   | NA           | NA | NA   | NA | NA  | NA   | NA | 20% |
| USA  | Lucar          | 18-Aug | CS | 31.5             | 100% | 100% | NA   | 0%   | NA   | NA           | NA | NA   | NA | NA  | 100% | NA | NA  |
| USA* | Matias         | 27-Jul | CS | 20               | 100% | 100% | 100% | 100% | 100% | 100%         | NA | 67%  | NA | 33% | 100% | NA | NA  |
| USA* | Pfeiffer       | 19-Aug | CS | NA               | NA   | NA   | NA   | NA   | NA   | NA           | NA | 100% | NA | NA  | NA   | NA | NA  |

NA = Not available. CS = case series. CS\*=cross section. SD = Surveillance data. PS = Prospective study. Publication date¶ limited in 2022. Countries\* with regional information are listed in order: 15 countries including Canada, United States, Argentina, Israel, Romania, Netherlands, United Kingdom, Portugal, Spain, France, Sweden, Denmark, Germany, Belgium, South Africa; 16 countries including Canada, United States, Mexico, Argentina, Israel,

Australia, Netherlands, United Kingdom, Portugal, Spain, France, Switzerland, Italy, Denmark, Germany, Belgium; Argentina Buenos Aires; France Paris; Germany Berlin; India New Delhi; Italy Apulia; Italy Florence; Italy Ampania; Italy Milan; Portugal Lisbon; Portugal Lisbon; Portugal Lisbon and Tagus Valley; Spain San Juan de Alicante; Spain Insular de Gran Canaria; Spain Madrid; Spain Madrid; UK London; USA Colorado and Columbia; USA California; USA Colombia; USA Massachusetts; USA Utah. Contact with people=contact with people with similar symptoms. If there is no mark, the median and interquartile range were used to represent age. †These values are average values and standard deviation. ‡These data are range. §These data are 30 to 40 years.

---

**Supplementary Table S2** Risk of bias assessment for case series - Study Quality Assessment Tools

| Country   | First Author  | Criteria                                                    |                                                                                                          |                                                                                                               |                                                                 |                                                              |                                                                                 |                                                                        |                                                                   |                                                                                         |                                       | Total |
|-----------|---------------|-------------------------------------------------------------|----------------------------------------------------------------------------------------------------------|---------------------------------------------------------------------------------------------------------------|-----------------------------------------------------------------|--------------------------------------------------------------|---------------------------------------------------------------------------------|------------------------------------------------------------------------|-------------------------------------------------------------------|-----------------------------------------------------------------------------------------|---------------------------------------|-------|
|           |               | Were there clear criteria for inclusion in the case series? | Was the condition measured in a standard, reliable way for all participants included in the case series? | Were valid methods used for identification of the condition for all participants included in the case series? | Did the case series have consecutive inclusion of participants? | Did the case series have complete inclusion of participants? | Was there clear reporting of the demographics of the participants in the study? | Was there clear reporting of clinical information of the participants? | Were the outcomes or follow up results of cases clearly reported? | Was there clear reporting of the presenting site(s)/clinic (s) demographic information? | Was statistical analysis appropriate? |       |
| Argentina | Pastor        | 1                                                           | 1                                                                                                        | 1                                                                                                             | 1                                                               | 1                                                            | 1                                                                               | 1                                                                      | 1                                                                 | 1                                                                                       | 1                                     | 10    |
| Brazil    | Martins-Filho | 1                                                           | 1                                                                                                        | 1                                                                                                             | 0                                                               | 1                                                            | 1                                                                               | 1                                                                      | 0                                                                 | 1                                                                                       | 1                                     | 8     |
| Brazil    | Lopes         | 1                                                           | 1                                                                                                        | 1                                                                                                             | 1                                                               | 1                                                            | 1                                                                               | 1                                                                      | 1                                                                 | 1                                                                                       | 1                                     | 10    |
| Brazil    | Salvato       | 0                                                           | 1                                                                                                        | 1                                                                                                             | 0                                                               | 0                                                            | 0                                                                               | 0                                                                      | 1                                                                 | 0                                                                                       | 1                                     | 4     |
| Canada    | Sukhdeo       | 1                                                           | 1                                                                                                        | 1                                                                                                             | 0                                                               | 1                                                            | 1                                                                               | 0                                                                      | 0                                                                 | 0                                                                                       | 1                                     | 6     |
| France    | Palich        | 1                                                           | 1                                                                                                        | 1                                                                                                             | 1                                                               | 1                                                            | 1                                                                               | 1                                                                      | 1                                                                 | 1                                                                                       | 1                                     | 10    |
| Germany*  | Hermanussen   | 1                                                           | 1                                                                                                        | 1                                                                                                             | 0                                                               | 1                                                            | 1                                                                               | 1                                                                      | 1                                                                 | 1                                                                                       | 1                                     | 9     |
| Germany   | Hornuss       | 1                                                           | 1                                                                                                        | 1                                                                                                             | 1                                                               | 1                                                            | 1                                                                               | 1                                                                      | 1                                                                 | 1                                                                                       | 1                                     | 10    |
| Germany   | Carannante    | 1                                                           | 1                                                                                                        | 1                                                                                                             | 0                                                               | 1                                                            | 1                                                                               | 1                                                                      | 0                                                                 | 1                                                                                       | 1                                     | 8     |

|           |                    |   |   |   |   |   |   |   |   |   |   |    |
|-----------|--------------------|---|---|---|---|---|---|---|---|---|---|----|
| Germany   | Noe                | 0 | 0 | 1 | 0 | 0 | 1 | 1 | 0 | 1 | 1 | 5  |
| Germany   | Kreuter            | 1 | 1 | 1 | 0 | 0 | 1 | 1 | 1 | 1 | 1 | 8  |
| Germany   | Wang               | 1 | 1 | 1 | 0 | 0 | 1 | 0 | 0 | 1 | 1 | 6  |
| India     | Relhan             | 1 | 1 | 1 | 0 | 1 | 1 | 1 | 1 | 1 | 1 | 9  |
| India     | Yadav              | 1 | 1 | 1 | 0 | 0 | 1 | 0 | 0 | 1 | 1 | 6  |
| Italy     | Loconsole          | 1 | 1 | 1 | 1 | 1 | 1 | 1 | 1 | 1 | 1 | 10 |
| Italy     | Pisano             | 1 | 1 | 1 | 0 | 1 | 1 | 1 | 1 | 1 | 1 | 9  |
| Italy     | Antinori           | 1 | 1 | 1 | 0 | 0 | 1 | 1 | 1 | 1 | 1 | 8  |
| Italy     | Quattri            | 1 | 1 | 1 | 0 | 0 | 1 | 1 | 1 | 1 | 1 | 8  |
| Italy     | Moschese           | 1 | 1 | 1 | 0 | 0 | 1 | 1 | 1 | 1 | 1 | 8  |
| Italy*    | Carannante         | 1 | 1 | 1 | 0 | 0 | 1 | 1 | 0 | 1 | 1 | 7  |
| Italy*    | Moschese           | 1 | 1 | 1 | 0 | 0 | 1 | 1 | 1 | 1 | 1 | 8  |
| Peru      | Pampa-Espinoza     | 1 | 1 | 1 | 1 | 1 | 1 | 1 | 0 | 1 | 1 | 9  |
| Portugal* | de Sousa           | 1 | 1 | 1 | 0 | 1 | 1 | 1 | 0 | 1 | 1 | 8  |
| Portugal  | Brazão             | 1 | 1 | 1 | 0 | 1 | 0 | 0 | 0 | 0 | 0 | 4  |
| Portugal  | Alpalha~o          | 1 | 1 | 1 | 1 | 1 | 1 | 1 | 0 | 1 | 1 | 9  |
| Singapore | Koh                | 1 | 1 | 1 | 0 | 1 | 1 | 1 | 0 | 1 | 1 | 8  |
| Spain     | Leal               | 1 | 1 | 1 | 0 | 1 | 1 | 0 | 0 | 0 | 1 | 6  |
| Spain     | Rodríguez-Cuadrado | 1 | 1 | 1 | 0 | 1 | 1 | 1 | 1 | 1 | 1 | 9  |
| UK        | Gedela             | 1 | 1 | 1 | 0 | 1 | 1 | 1 | 1 | 1 | 1 | 9  |
| USA       | Peters             | 1 | 1 | 1 | 0 | 1 | 1 | 1 | 1 | 1 | 1 | 9  |
| USA       | Cash-Goldwasser    | 1 | 1 | 1 | 1 | 1 | 1 | 1 | 1 | 1 | 1 | 10 |
| USA       | Minhaj             | 1 | 1 | 1 | 0 | 1 | 1 | 1 | 1 | 1 | 1 | 9  |
| USA*      | Pastula            | 1 | 1 | 1 | 1 | 1 | 1 | 1 | 1 | 1 | 1 | 10 |
| USA       | Tanch              | 1 | 1 | 1 | 0 | 1 | 1 | 0 | 1 | 1 | 1 | 8  |



|      |                |   |   |   |   |   |   |   |   |   |   |    |
|------|----------------|---|---|---|---|---|---|---|---|---|---|----|
| USA  | Rodriguez-Nava | 1 | 1 | 1 | 0 | 1 | 1 | 1 | 1 | 1 | 1 | 9  |
| USA* | Lucar          | 1 | 1 | 1 | 0 | 0 | 1 | 1 | 1 | 1 | 1 | 8  |
| USA* | Matias         | 1 | 1 | 1 | 1 | 1 | 1 | 1 | 1 | 1 | 1 | 10 |
| USA* | Pfeiffer       | 1 | 1 | 1 | 0 | 0 | 0 | 0 | 0 | 1 | 0 | 4  |
| USA* | Thompson       | 1 | 0 | 1 | 0 | 0 | 0 | 1 | 0 | 1 | 1 | 5  |

---

\*Countries with region information are listed in order: ; Germany Hamburg, Italy Campania; Italy Milan; Portugal Lisbon, USA Colorado and the District of Columbia, USA Colombia; USA Massachusetts; USA Utah; USA California.

---

**Supplementary Table S3** Risk of bias assessment for studies reporting prevalence data - Study Quality Assessment Tools

| Country       | First Author   | Criteria                                                           |                                                        |                               |                                                              |                                                                                    |                                                                  |                                                                              |                                             |                                                                                              | Total |
|---------------|----------------|--------------------------------------------------------------------|--------------------------------------------------------|-------------------------------|--------------------------------------------------------------|------------------------------------------------------------------------------------|------------------------------------------------------------------|------------------------------------------------------------------------------|---------------------------------------------|----------------------------------------------------------------------------------------------|-------|
|               |                | Was the sample frame appropriate to address the target population? | Were study participants sampled in an appropriate way? | Was the sample size adequate? | Were the study subjects and the setting described in detail? | Was the data analysis conducted with sufficient coverage of the identified sample? | Were valid methods used for the identification of the condition? | Was the condition measured in a standard, reliable way for all participants? | Was there appropriate statistical analysis? | Was the response rate adequate, and if not, was the low response rate managed appropriately? |       |
| 15 countries* | Angelo         | 1                                                                  | 1                                                      | 1                             | 1                                                            | 1                                                                                  | 1                                                                | 1                                                                            | 1                                           | 1                                                                                            | 8     |
| 16 countries* | Thornhill      | 1                                                                  | 1                                                      | 1                             | 1                                                            | 1                                                                                  | 1                                                                | 1                                                                            | 1                                           | 1                                                                                            | 9     |
| Europe        | Vaughan        | 1                                                                  | 1                                                      | 1                             | 1                                                            | 1                                                                                  | 1                                                                | 1                                                                            | 1                                           | 1                                                                                            | 8     |
| France        | Mailhe         | 1                                                                  | 1                                                      | 1                             | 1                                                            | 1                                                                                  | 1                                                                | 1                                                                            | 1                                           | 1                                                                                            | 9     |
| France Paris  | Thy            | 1                                                                  | 1                                                      | 1                             | 1                                                            | 1                                                                                  | 1                                                                | 1                                                                            | 1                                           | 1                                                                                            | 8     |
| Germany       | Hoffmann       | 1                                                                  | 1                                                      | 1                             | 1                                                            | 1                                                                                  | 1                                                                | 1                                                                            | 0                                           | 1                                                                                            | 7     |
| Germany       | Hoffmann       | 1                                                                  | 1                                                      | 1                             | 1                                                            | 1                                                                                  | 1                                                                | 1                                                                            | 1                                           | 1                                                                                            | 9     |
| Israel        | Yakubovsky     | 1                                                                  | 1                                                      | 0                             | 0                                                            | 1                                                                                  | 1                                                                | 1                                                                            | 0                                           | 1                                                                                            | 5     |
| Italy         | Mondi          | 1                                                                  | 1                                                      | 1                             | 1                                                            | 1                                                                                  | 1                                                                | 1                                                                            | 1                                           | 0                                                                                            | 8     |
| Italy         | Agrati         | 1                                                                  | 1                                                      | 1                             | 1                                                            | 1                                                                                  | 1                                                                | 1                                                                            | 1                                           | 1                                                                                            | 8     |
| Italy         | Aromolo        | 1                                                                  | 1                                                      | 0                             | 1                                                            | 0                                                                                  | 1                                                                | 1                                                                            | 0                                           | 1                                                                                            | 5     |
| Italy         | Moschese       | 0                                                                  | 1                                                      | 1                             | 1                                                            | 1                                                                                  | 1                                                                | 1                                                                            | 1                                           | 0                                                                                            | 7     |
| Portugal*     | Perez Duque    | 1                                                                  | 1                                                      | 1                             | 1                                                            | 1                                                                                  | 1                                                                | 1                                                                            | 1                                           | 1                                                                                            | 9     |
| Portugal*     | Diogo de Sousa | 1                                                                  | 1                                                      | 0                             | 1                                                            | 0                                                                                  | 1                                                                | 1                                                                            | 0                                           | 1                                                                                            | 5     |

|           |                 |   |   |   |   |   |   |   |   |   |   |
|-----------|-----------------|---|---|---|---|---|---|---|---|---|---|
| Portugal* | Caldeira        | 1 | 1 | 1 | 1 | 1 | 1 | 1 | 1 | 1 | 8 |
| Spain     | Rodriguez       | 1 | 1 | 1 | 1 | 1 | 1 | 1 | 1 | 1 | 8 |
| Spain     | Del Río García  | 1 | 1 | 1 | 1 | 1 | 1 | 1 | 1 | 1 | 8 |
| Spain     | Aguilera-Alonso | 1 | 1 | 0 | 1 | 0 | 1 | 1 | 0 | 1 | 5 |
| Spain     | Betancort-Plata | 1 | 1 | 1 | 1 | 1 | 1 | 1 | 1 | 1 | 8 |
| Spain     | Suárez          | 1 | 1 | 1 | 1 | 1 | 1 | 1 | 1 | 0 | 8 |
|           | Rodríguez       |   |   |   |   |   |   |   |   |   |   |
| Spain     | Català          | 1 | 1 | 1 | 1 | 1 | 1 | 1 | 1 | 1 | 9 |
| Spain     | Tarín-Vicente   | 1 | 1 | 1 | 1 | 1 | 1 | 1 | 1 | 1 | 9 |
| Spain*    | Inigo Martinez  | 1 | 1 | 1 | 1 | 1 | 1 | 1 | 1 | 1 | 9 |
| Spain*    | Orviz           | 1 | 1 | 1 | 1 | 1 | 1 | 1 | 1 | 1 | 9 |
| Spain*    | García-Piqueras | 1 | 1 | 1 | 1 | 1 | 1 | 1 | 1 | 1 | 8 |
| Spain*    | Gomez-Garberi   | 1 | 1 | 1 | 1 | 1 | 1 | 1 | 1 | 1 | 8 |
| UK        | Girometti       | 1 | 1 | 1 | 1 | 1 | 1 | 1 | 1 | 1 | 9 |
| UK*       | Patel           | 1 | 1 | 1 | 1 | 1 | 1 | 1 | 1 | 1 | 9 |
| USA       | Curran          | 1 | 1 | 1 | 1 | 1 | 1 | 1 | 1 | 1 | 8 |
| USA       | O'Laughlin      | 1 | 1 | 1 | 1 | 0 | 1 | 1 | 0 | 1 | 6 |
| USA       | Meyerowitz      | 1 | 1 | 1 | 1 | 1 | 1 | 1 | 1 | 1 | 8 |
| USA       | Kava            | 1 | 1 | 1 | 1 | 1 | 1 | 1 | 1 | 1 | 8 |
| USA       | Hennessee       | 1 | 1 | 1 | 1 | 1 | 1 | 1 | 1 | 1 | 8 |
| USA       | Miller          | 1 | 1 | 1 | 1 | 1 | 1 | 1 | 1 | 1 | 8 |
| USA       | Minhaj          | 1 | 1 | 1 | 1 | 1 | 1 | 1 | 1 | 1 | 9 |
| USA       | Philpott        | 1 | 1 | 1 | 1 | 1 | 1 | 1 | 1 | 0 | 8 |
| USA*      | Desai           | 1 | 1 | 1 | 1 | 1 | 1 | 1 | 1 | 1 | 9 |

---

Countries\* with regional information are listed in order: 15 countries including Canada, United States, Argentina, Israel, Romania, Netherlands, United Kingdom, Portugal, Spain, France, Sweden, Denmark, Germany, Belgium, South Africa; 16 countries including Canada, United States, Mexico, Argentina, Israel, Australia, Netherlands, United

---

---

Kingdom, Portugal, Spain, France, Switzerland, Italy, Denmark, Germany, Belgium; Portugal Lisbon and Tagus Valley; Portugal Lisbon; Portugal Lisbon; Spain Madrid; Spain Madrid; Spain Madrid; Spain San Juan de Alicante; UK London; USA California.

---

**Supplementary Table S4** Concurrent or history of sexually transmitted infections in persons with mpox infection

| Country*      | First author      | STIs# | Gonorrhea | Chlamydia | Syphilis | HSV 1 or 2 | Lymphogranuloma<br>venereum | Mycoplasma<br>genitalium |
|---------------|-------------------|-------|-----------|-----------|----------|------------|-----------------------------|--------------------------|
| 15 countries* | Angelo            | 15%   | 5%        | 2%        | 6%       | NA         | 1%                          | 1%                       |
| 16 countries* | Thornhill         | 29%#  | 8%        | 5%        | 9%       | 1%         | 1%                          | NA                       |
| Brazil        | Martins-<br>Filho | 0%    | NA        | NA        | 0%       | 0%         | NA                          | NA                       |
| Brazil        | Lopes             | 100%  | NA        | NA        | 100%     | NA         | NA                          | NA                       |
| Europe        | Vaughan           | 0%    | NA        | NA        | NA       | NA         | NA                          | NA                       |
| France        | Mailhe            | 79%   | NA        | NA        | NA       | NA         | NA                          | NA                       |
| France Paris  | Thy               | 67%   | NA        | NA        | NA       | NA         | NA                          | NA                       |
| Germany       | Hoffmann          | 59%   | 37%       | 27%       | 19%      | NA         | NA                          | 8%                       |
| Germany*      | Hermanussen       | 33%   | NA        | NA        | 33%      | NA         | NA                          | NA                       |
| Germany       | Hornuss           | 25%   | 25%       | NA        | NA       | NA         | NA                          | 25%                      |
| Germany       | Kreuter           | 0%    | 0%        | 0%        | 0%       | 0%         | 0%                          | 0%                       |

|           |            |      |     |     |      |    |    |     |
|-----------|------------|------|-----|-----|------|----|----|-----|
| Germany   | Wang       | 33%  | 17% | 17% | NA   | NA | NA | NA  |
| Germany*  | Pfäfflin   | NA   | 50% | NA  | 17%  | NA | NA | 17% |
| Germany   | Hoffmann   | 52%  | 32% | NA  | NA   | NA | NA | NA  |
| Israel    | Yakubovsky | 58%  | 20% | NA  | NA   | NA | NA | NA  |
| Italy     | Andrea     | NA   | NA  | NA  | 75%  | NA | NA | NA  |
| Italy*    | Pisano     | 100% | 0%  | 0%  | 0%   | 0% | 0% | 0%  |
| Italy     | Moschese   | 50%  | 33% | NA  | 17%  | NA | NA | NA  |
| Italy     | Moschese   | 84%  | NA  | NA  | NA   | NA | NA | NA  |
| Italy     | Quattri    | 100% | 50% | NA  | 100% | NA | NA | NA  |
| Italy     | Aromolo    | 83%  | 17% | 0%  | 50%  | 0% | NA | NA  |
| Portugal  | Alpalhão   | 45%  | NA  | NA  | NA   | NA | NA | NA  |
| Portugal* | de Sousa   | 0%   | 0%  | 0%  | 0%   | 0% | NA | NA  |
| Portugal  | Brazão     | 100% | 25% | NA  | 75%  | NA | NA | NA  |

|        |                 |      |     |     |      |      |    |     |
|--------|-----------------|------|-----|-----|------|------|----|-----|
| Spain  | Alba Català     | 76%  | NA  | NA  | NA   | NA   | NA | NA  |
| Spain  | Tarín-Vicente   | 17%  | 3%  | 6%  | 7%   | 1%   | NA | 1%  |
| Spain  | Gomez-Garberi   | 43%  | 8%  | 17% | 8%   | 8%   | NA | 8%  |
| Spain  | Betancort-Plata | NA   | NA  | 2%  | NA   | 2%   | NA | 7%  |
| Spain  | García-Piqueras | 91%  | 49% | 34% | 64%  | 0%   | 0% | 11% |
| Spain* | orviz           | 23%# | 13% | NA  | 8%   | NA   | NA | 2%  |
| UK     | Nicolò          | 25%  | 18% | 12% | NA   | NA   | NA | NA  |
| UK     | Gedela          | 100% | NA  | NA  | NA   | 100% | NA | NA  |
| UK*    | Patel           | 31%# | 17% | 9%  | 3%   | 6%   | NA | NA  |
| USA    | Philpott        | 100% | 50% | NA  | 100% | NA   | NA | NA  |
| USA    | Curran          | 18%  | 14% | 11% | 5%   | NA   | NA | NA  |
| USA    | Pastula         | 50%  | 0%  | 0%  | 50%  | 0%   | 0% | 0%  |
| USA    | Miller          | 28%  | NA  | NA  | NA   | NA   | NA | NA  |

|     |                |      |    |    |    |    |    |    |
|-----|----------------|------|----|----|----|----|----|----|
| USA | Rodriguez-Nava | 100% | NA | NA | NA | NA | NA | NA |
| USA | Lucar          | 0%   | 0% | 0% | 0% | 0% | NA | NA |

Publications that did not report any STI were excluded from this table. \*Countries with regional information are listed in order: 15 countries including Canada, United States, Argentina, Israel, Romania, Netherlands, United Kingdom, Portugal, Spain, France, Sweden, Denmark, Germany, Belgium, South Africa; 16 countries including Canada, United States, Mexico, Argentina, Israel, Australia, Netherlands, United Kingdom, Portugal, Spain, France, Switzerland, Italy, Denmark, Germany, Belgium; Germany Hamburg, Germany Berlin, Italy Florence, Portugal Lisbon, Spain Madrid; UK London; USA Colombia. #These values are concomitant STIs. If there is no mark, the values are the current status of infection.
